# Supplementary material
Source: publisher site journal article supplement (https://www.spandidos-publications.com/2902/downloadSupplementary)

Figure S1. Comparison of lnc-TCF7 among patients who received BD, BDD or MPB treatment. lnc-TCF7 level was similar among patients who received BD, BDD or MPB treatment. lnc-TCF7, long non-coding RNA transcription factor 7; BD, Bortezomib/dexamethasone; BDD, Bortezomib/doxorubicin/dexamethasone; MPB, Melphalan/prednisone/bortezomib.

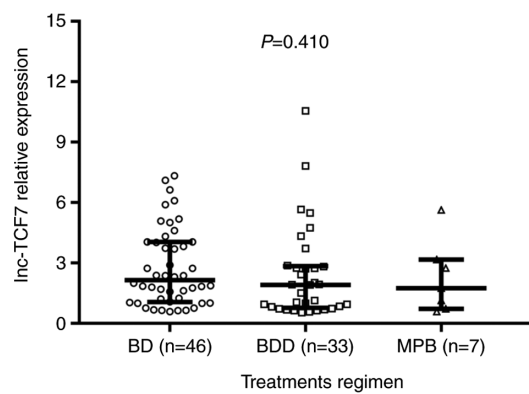

Figure S2. miR-203 expression after plasmid transfection. miR-203 expression was reduced following miR-inhibitor. \*\*\*P<0.001. NC, negative control; miR, microRNA.

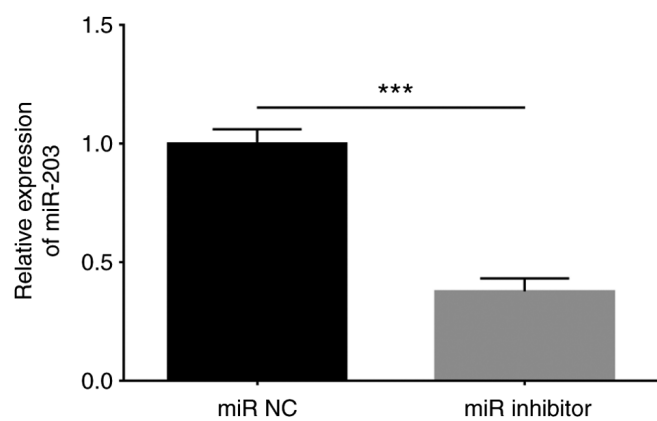

Supplement: Supplementary file 1 [file downloadSupplementary]
